# Supplementary material
Source: HighWire-hosted journal article supplement (https://bjo.bmj.com/content/107/1/72)
Supplement: inline-supplementary-material-3 [file inline-supplementary-material-3.pdf]

**Supplementary Table 2.** Change in mean BCVA from baseline in treatment-naïve patients, by baseline

BCVA

| Study visits | Change in mean BCVA (SD) from baseline, letters |                               |                               |
|--------------|-------------------------------------------------|-------------------------------|-------------------------------|
|              | All treatment-naïve patients                    | Baseline BCVA<br>≥70 letters* | Baseline BCVA<br>≤34 letters† |
| Week 6       | 2.8 (8.3)                                       | −0.6 (5.0)                    | 0.5 (5.9)                     |
| N            | 38                                              | 11                            | 6                             |
| p value      | 0.043                                           | 0.679                         | 0.844                         |
| Week 16      | 1.6 (9.5)                                       | −1.0 (7.1)                    | 1.9 (3.9)                     |
| N            | 49                                              | 12                            | 9                             |
| p value      | 0.259                                           | 0.634                         | 0.183                         |
| Week 26      | 2.3 (11.0)                                      | −0.2 (8.3)                    | 1.4 (2.1)                     |
| N            | 28                                              | 5                             | 5                             |
| p value      | 0.289                                           | 0.959                         | 0.206                         |
| Week 52      | 3.4 (10.3)                                      | −1.3 (7.4)                    | 4.7 (4.0)                     |
| N            | 40                                              | 12                            | 3                             |
| p value      | 0.042                                           | 0.543                         | 0.184                         |

\*Driving vision standard.

†Legal blindness standard.

BCVA, best-corrected visual acuity; SD, standard deviation.
